# Supplementary material
Source: HighWire-hosted journal article supplement (https://adc.bmj.com/highwire/filestream/186766/field_highwire_adjunct_files/0/adc.2010.208843supp_appendix1.pdf)
Supplement: adc.2010.208843supp_appendix1.pdf [file adc.2010.208843supp_appendix1.pdf]

## APPENDIX 1- Search strategy

### EMBASE

1. (ciprofloxac\$ or quinolone\$ or fluoroquinolon\$).mp. [mp=title, original title, abstract, name of substance word, subject heading word, unique identifier]
2. adverse effect\$ or drug reactio\$ or side effect\$).mp. [mp=title, original title, abstract, name of substance word, subject heading word, unique identifier]
3. arthropath\$.mp
4. half life or pharmacokineti\$.mp.
5. 1 and 2
6. 1 and 3
7. 5 or 6
8. 4 and 1
9. limit 7 to (human and (infant <to one year> or child <unspecified age> or preschool child <1 to 6 years> or school child <7 to 12 years> or adolescent <13 to 17 years>)
10. limit 8 to (human and (infant <to one year> or child <unspecified age> or preschool child <1 to 6 years> or school child <7 to 12 years> or adolescent <13 to 17 years>)

### MEDLINE

1. ciprofloxaci\$.mp. [mp=title, original title, abstract, name of substance word, subject heading word, unique identifier]
2. (adverse effect\$ or drug reactio\$ or side effect\$).mp. [mp=title, original title, abstract, name of substance word, subject heading word, unique identifier]
3. arthropath\$.mp. or \*Arthritis/
4. Half-Life/ or pharmacokineti\$.mp.
5. 1 and 2
6. 1 and 3
7. 5 or 6
8. limit 7 to (humans and "all child (0 to 18 years)")
9. 1 and 4
10. limit 9 to (humans and "all child (0 to 18 years)")

This search strategy was adapted to the CENTRAL and CINAHL databases respectively.
